# Supplementary material for: Aldh2 Attenuates Stem Cell Factor/Kit-Dependent Signaling and Activation in Mast Cells
Source: Int J Mol Sci. 2019 Dec 10;20(24):6216. doi: 10.3390/ijms20246216 (PMC6940998; doi:10.3390/ijms20246216)
Supplement: Supplementary file 1 [file ijms-20-06216-s001.pdf]

# Aldh2 Attenuates Stem Cell Factor/Kit Dependent Signaling

Do-Kyun Kim <sup>1,†,\*</sup>, Young-Eun Cho <sup>2,‡</sup>, Byoung-Joon Song <sup>2</sup>, Toshihiro Kawamoto <sup>3</sup>,  
Dean D. Metcalfe <sup>1</sup> and Ana Olivera <sup>1,\*</sup>

<sup>1</sup> Mast Cell Biology Section, Laboratory of Allergic Diseases, National Institute of Allergy and Infectious Diseases (NIAID), National Institutes of Health (NIH), Bethesda, MD 20892, USA;  
[dmetcalfe@niaid.nih.gov](mailto:dmetcalfe@niaid.nih.gov) (D.D.M.)

<sup>2</sup> Section of Molecular Pharmacology and Toxicology, Laboratory of Membrane Biochemistry and Biophysics, National Institute on Alcohol Abuse and Alcoholism (NIAAA), NIH, Bethesda, MD 20892, USA; [yecho@andong.ac.kr](mailto:yecho@andong.ac.kr) (Y.-E.C.); [bj.song@nih.gov](mailto:bj.song@nih.gov) (B.-J.S.)

<sup>3</sup> Occupational Health Research and Development Center, Japan Industrial Safety and Health Association, Tokyo 108-0014, Japan; [t-kawamoto@jisha.or.jp](mailto:t-kawamoto@jisha.or.jp) (T.K.)

<sup>†</sup> Current address: Center for Biomolecular & Cellular Structure, Institute for Basic Science (IBS), Daejeon 34126, South Korea.

<sup>‡</sup> Current address: Department of Food and Nutrition, Andong National University, Andong, Kyungpook 760-749, South Korea.

\* Correspondence: [dkkim0912@ibs.re.kr](mailto:dkkim0912@ibs.re.kr) (D.-K.K); [Ana.Olivera@nih.gov](mailto:Ana.Olivera@nih.gov) (A.O.)

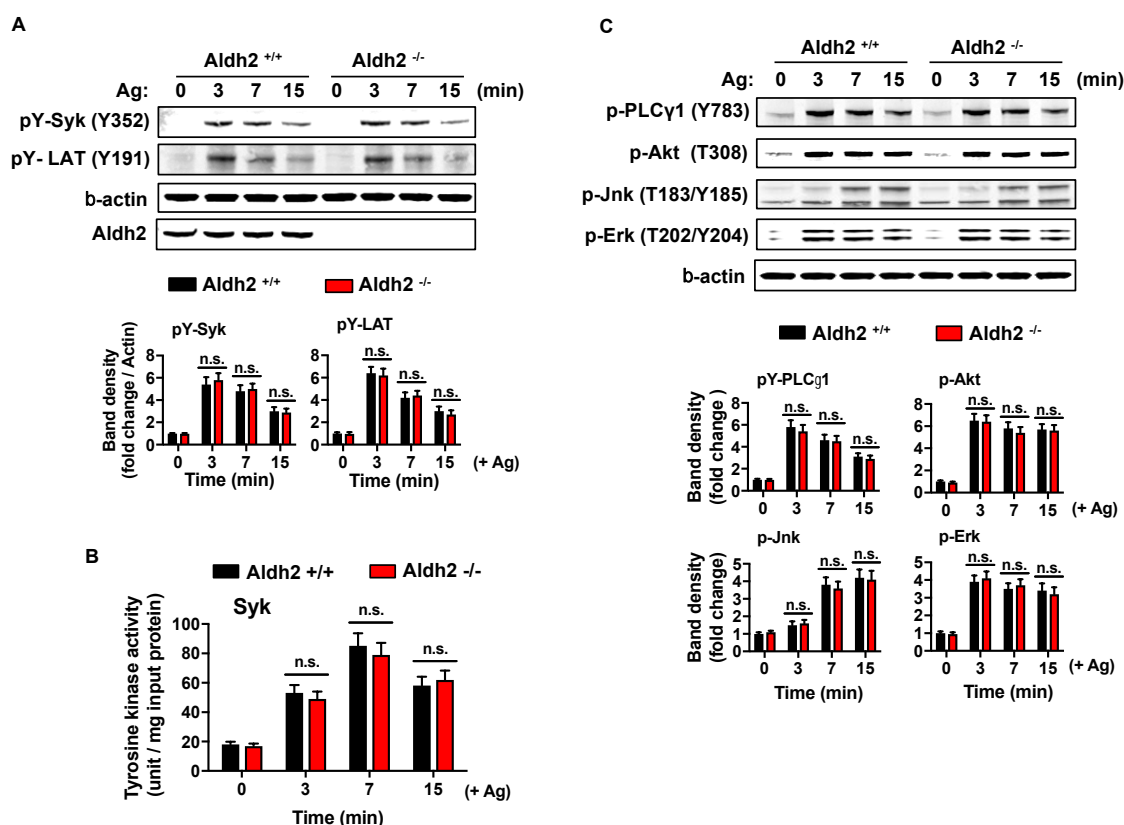

**Figure S1.** Aldh2 deficiency does not alter FcεRI-mediated signaling in BMMC. (a) Changes in the phosphorylation of Syk and LAT at 0, 3, 7 and 15 min after activation with IgE/Ag of Aldh2<sup>+/+</sup> or Aldh2<sup>-/-</sup> BMMCs, as indicated. BMMCs were sensitized with anti-DNP IgE (100 ng/mL) overnight, then washed and challenged with 100 ng/mL of Ag (DNP-HSA). Lysates were obtained and phosphorylation of Syk and LAT determined by Western blotting. The histograms below show the

average fold changes in band intensities after normalization using  $\beta$ -actin as a loading control. **(b)** Changes in Syk tyrosine kinase phosphorylation in immunoprecipitates of Aldh2<sup>+/+</sup> or Aldh2<sup>-/-</sup> BMMCs after stimulation with IgE/Ag for various times, as indicated. **(c)** Changes in the phosphorylation of PLC $\gamma$ 1, Akt, Jnk and Erk at 0, 3, 7 and 15 min after activation with IgE/Ag of Aldh2<sup>+/+</sup> or Aldh2<sup>-/-</sup> BMMCs. Lysates were obtained and phosphorylation of Syk and LAT determined by Western blotting. The histograms below show the average fold changes in band intensities after normalization using  $\beta$ -actin as a loading control. Data are the mean  $\pm$  SEM of 3 independent cultures. N.s., not significant.
